# Supplementary material for: Using high-resolution melting to identify Calliphoridae (blowflies) species from Brazil
Source: PeerJ. 2020 Nov 30;8:e9680. doi: 10.7717/peerj.9680 (PMC7713596; doi:10.7717/peerj.9680)
Supplement: Supplemental Information 4 — NRC = No Reference Cluster Tm = melting temperature (mean of the samples run in triplicates) SD = standard deviation CI = confidence interval (95%) [file peerj-08-9680-s004.xlsx]

## Sheet: HRM82bp
Code	Sample Name	Tm	SD	CI (95%)
Cme1	C. megacephala 55a	77.46	0.11	77.46±0.13
Cme2	C. megacephala 55b	77.43	0.03	77.43±0.04
Cme3	C. megacephala 189a	77.50	0.05	77.50±0.06
Cme4	C. megacephala 189b	77.40	0.08	77.40±0.09
Cme5	C. megacephala 58a	77.33	0.07	77.33±0.08
Cme6	C. megacephala 58b	77.48	0.05	77.48±0.05
Cme7	C. megacephala 58c	77.46	0.06	77.46±0.07
Cme8	C. megacephala 58d	77.41	0.16	77.41±0.18
Lc1	L. cuprina 1	78.07	0.08	78.07±0.09
Lc2	L. cuprina 2	78.14	0	78.14
Lc3	L. cuprina 3	78.02	0.04	78.02±0.05
Lc4	L. cuprina 4	78.07	0.07	78.07±0.07
Lc5	L. cuprina 5	78.10	0.04	78.10±0.05
Le1	L.eximia 1	78.38	0.31	78.38±0.35
Le2	L.eximia 2	78.50	0.12	78.50±0.14
Le3	L.eximia 3	NRC	-	-
Le4	L.eximia 4	77.73	0.57	77.73±0.65
Le5	L.eximia 5	78.42	0.13	78.42±0.15
199	L.eximia 199	78.42	0.06	78.42±0.06
Ca1	C. albiceps 1	77.35	0.24	77.35±0.27
Ca2	C. albiceps 2	77.45	0.25	77.45±0.29
Ca3	C. albiceps 3	77.18	0.18	77.18±0.21
Ca4	C. albiceps 4	77.12	0.31	77.12±0.35
Ca5	C. albiceps 195a	NRC	-	-
Ca6	C. albiceps 195b	77.16	0.29	77.16±0.33
Ca7	C. albiceps 93	NRC	-	-
Ca8	C. albiceps 183	NRC	-	-
Cp1	C. putoria 1	77	0.16	77.00±0.19
Cp2	C. putoria 2	77.19	0.09	77.19±0.10
Cp3	C. putoria 3	77.14	0.18	77.14±0.21
Cp4	C. putoria 4	77.08	0.11	77.08±0.12
Cp5	C. putoria 65a	77.13	0.15	77.13±0.17
Cp6	C. putoria 65b	77.24	0.20	77.24±0.22
Cp7	C.putoria 191a	77.03	0.05	77.03±0.05
Cp8	C. putoria 191b	76.93	0.17	76.93±0.19
Cma1	Co. macellaria 50a	77.23	0.09	77.23±0.10
Cma2	Co. macellaria 50b	77.21	0.04	77.21±0.05
Cma3	Co. macellaria 71a	77.15	0.05	77.15±0.05
Cma4	Co. macellaria 71b	77.20	0.07	77.20±0.08
Cma5	Co. macellaria 87a	77.22	0.02	77.22±0.02
Cma6	Co. macellaria 87b	77.13	0.10	77.13±0.11
Cma7	Co. macellaria 129	77.26	0.04	77.26±0.05
Cma8	Co. macellaria 56d	77.16	0.12	77.16±0.14

## Sheet: HRM124bp
Code	Sample Name	Tm	SD	CI (95%)
Cme1	C. megacephala 55a	75.51	0.08	75.51±0.09
Cme2	C. megacephala 55b	75.51	0.07	75.51±0.08
Cme3	C. megacephala 189a	75.45	0.08	75.45±0.09
Cme4	C. megacephala 189b	75.42	0.1	75.42±0.11
Cme5	C. megacephala 58a	75.39	0.07	75.39±0.08
Cme6	C. megacephala 58b	75.49	0.09	75.49±0.10
Cme7	C. megacephala 58c	75.55	0.09	75.55±0.10
Cme8	C. megacephala 58d	75.32	0.3	75.32±0.34
Lc1	L. cuprina 1	74.80	0.02	74.80±0.02
Lc2	L. cuprina 2	74.83	0.02	74.83±0.02
Lc3	L. cuprina 3	NRC	-	-
Lc4	L. cuprina 4	NRC	-	-
Lc5	L. cuprina 5	NRC	-	-
Le1	L.eximia 1	NRC	-	-
Le2	L.eximia 2	NRC	-	-
Le3	L.eximia 3	74.87	0.18	74.87±0.20
Le4	L.eximia 4	NRC	-	-
Le5	L.eximia 5	74.84	0.11	74.84±0.13
199	L.eximia 199	74.83	0.11	74.83±0.12
Ca1	C. albiceps 1	NRC	-	-
Ca2	C. albiceps 2	NRC	-	-
Ca3	C. albiceps 3	74.77	0.06	74.77±0.07
Ca4	C. albiceps 4	74.74	0.12	74.74±0.13
Ca5	C. albiceps 195a	74.75	0.14	74.75±0.16
Ca6	C. albiceps 195b	NRC	-	-
Ca7	C. albiceps 93	74.74	0.09	74.74±0.11
Ca8	C. albiceps 183	74.77	0.05	74.77±0.05
Cp1	C. putoria 1	NRC	-	-
Cp2	C. putoria 2	NRC	-	-
Cp3	C. putoria 3	74.94	0.34	74.94±0.38
Cp4	C. putoria 4	74.95	0.25	74.95±0.28
Cp5	C. putoria 65a	74.97	0.07	74.97±0.08
Cp6	C. putoria 65b	74.98	0.10	74.98±0.12
Cp7	C.putoria 191a	NRC	-	-
Cp8	C. putoria 191b	NRC	-	-
Cma1	Co. macellaria 50a	75.02	0.02	75.02±0.03
Cma2	Co. macellaria 50b	75.03	0.04	75.03±0.04
Cma3	Co. macellaria 71a	NRC	-	-
Cma4	Co. macellaria 71b	NRC	-	-
Cma5	Co. macellaria 87a	75.00	0.08	75.00±0.09
Cma6	Co. macellaria 87b	74.99	0.17	74.99±0.19
Cma7	Co. macellaria 129	75.03	0.05	75.03±0.05
Cma8	Co. macellaria 56d	75.10	0.09	75.10±0.11
